# Supplementary material for: The gene expression profiles of primary and metastatic melanoma yields a transition point of tumor progression and metastasis
Source: PubMed Central journal article supplement (PMC2408576; doi:10.1186/1755-8794-1-13), 2008-04-28

# Gene Ontology and Biological Processes

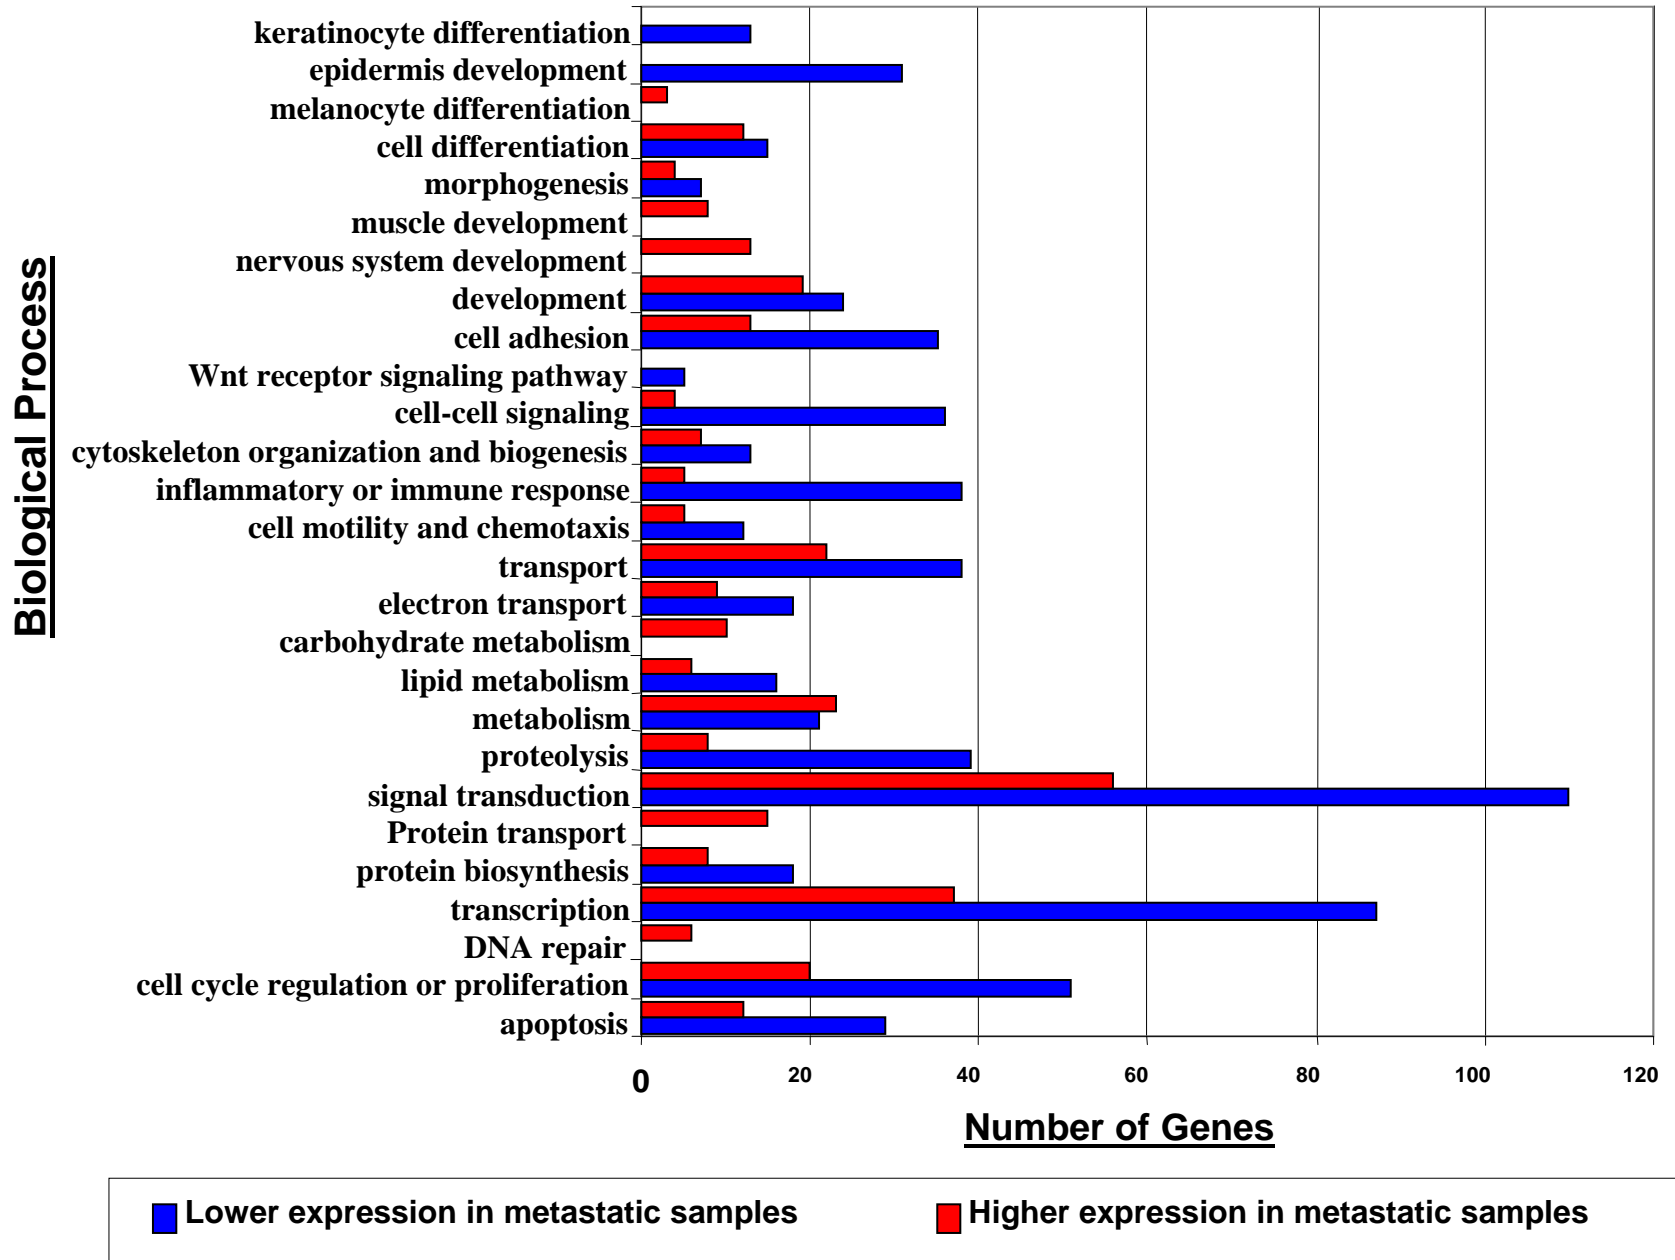

Supplement: 1755-8794-1-13-S3.pdf [file 1755-8794-1-13-S3.pdf]
